# Supplementary material for: A 12-Week Electronic Mentoring Employment Preparation Intervention for Youth With Physical Disabilities: Pilot Feasibility Randomized Controlled Trial
Source: JMIR Pediatr Parent. 2019 Mar 29;2(1):e12088. doi: 10.2196/12088 (PMC6716483; doi:10.2196/12088)
Supplement: Multimedia Appendix 1 [file pediatrics_v2i1e12088_app1.pdf]

## Multimedia Appendix 1: Overview of weekly topics

| Topic                                         |
|-----------------------------------------------|
| Introduction and goal setting                 |
| Life skills                                   |
| Managing disability at work                   |
| Family role in supporting employment          |
| Aspirations and expectations                  |
| Volunteerism                                  |
| Finding a job                                 |
| Social networking and community resources     |
| Preparing for job interviews                  |
| Learning from professionals with disabilities |
| Career pathways and transitions               |
| Referrals and next steps                      |
